# Supplementary material
Source: HighWire-hosted journal article supplement (https://jnm.snmjournals.org/highwire/filestream/94614/field_highwire_adjunct_files/0/140343_Supplemental_Data.pdf)
Supplement: 140343_Supplemental_Data.pdf [file 140343_Supplemental_Data.pdf]

## SUPPLEMENTAL METHODS

### Radiosynthesis

The radiosynthesis of  $^{18}\text{F}$ -FPIA was automatically performed on a Siemens Explora RN + LC platform. Aqueous  $^{18}\text{F}$ -fluoride was trapped into a QMA cartridge preconditioned with water (1 mL) and eluted into a 5-mL Wheaton vial with  $\text{KHCO}_3$  (100  $\mu\text{L}$  of a 12 mg/mL stock solution in water) and K222 (400  $\mu\text{L}$  of a 18 mg/mL stock solution in water). The fluoride was dried at  $105^\circ\text{C}$ , and an azeotrope of MeCN (0.5 mL  $\times$  2) was used to aid drying. Precursor **1** (8 mg) in DMF (450  $\mu\text{L}$ ) was added, and the reaction mixture was heated at  $120^\circ\text{C}$  for 10 min and then cooled to  $30^\circ\text{C}$ . The reaction mixture was quenched with water (4 mL), and labeled intermediate  $^{18}\text{F}$ -**2** was isolated by semipreparative HPLC (Phenomenex Gemini  $5\mu$  C18 110A [100  $\times$  10 mm, 5 micron] column, isocratic 20% EtOH/water method, flow rate of 5 mL/min, retention time [rt] of 10 min). NaOH (1 M, 200  $\mu\text{L}$ ) was added and the mixture heated at  $60^\circ\text{C}$  for 5 min and then cooled to  $45^\circ\text{C}$ . Ethanol was removed at  $45^\circ\text{C}$  under a vacuum for 30 min, and the mixture was neutralized with HCl (1 M,  $\sim$ 200  $\mu\text{L}$ ).

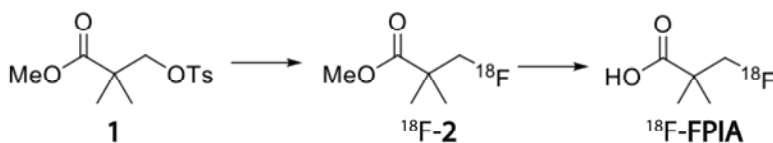

### Dynamic PET imaging studies

Dynamic  $^{18}\text{F}$ -FPIA imaging scans were obtained on a dedicated small-animal PET/SPECT/CT scanner (Inveon [Siemens Medical Solutions USA, Inc.]; matrix size,  $256 \times 256 \times 159$ ) following a bolus intravenous injection of  $\sim$ 3.7 MBq of the radiotracer into tumor-bearing mice. Dynamic scans were acquired in list mode format over 60 min.

The acquired data were then sorted into 0.5-mm sinogram bins and 19 time frames for image reconstruction ( $4 \times 15$  s,  $4 \times 60$  s, and  $11 \times 300$  s), which was done by iterative reconstruction (2-dimensional ordered-subsets expectation maximization). The Inveon Research Workplace software was used for visualization of radiotracer uptake in the tumor; 30- to 60-min cumulative images of the dynamic data were used to define 3-dimensional volumes of interest. The count densities were averaged for all volumes of interest at each time point to obtain a time versus radioactivity curve (TAC). Tumor TACs were normalized to injected dose, measured by a VDC-304 dose calibrator (Veenstra Instruments), and expressed as percentage injected dose per milliliter of tissue. The area under the TAC, calculated as the integral of %ID/mL from 0 to 60 min, and the normalized uptake of radiotracer at 60 min (%ID/mL<sub>60</sub>) were also used for comparisons.

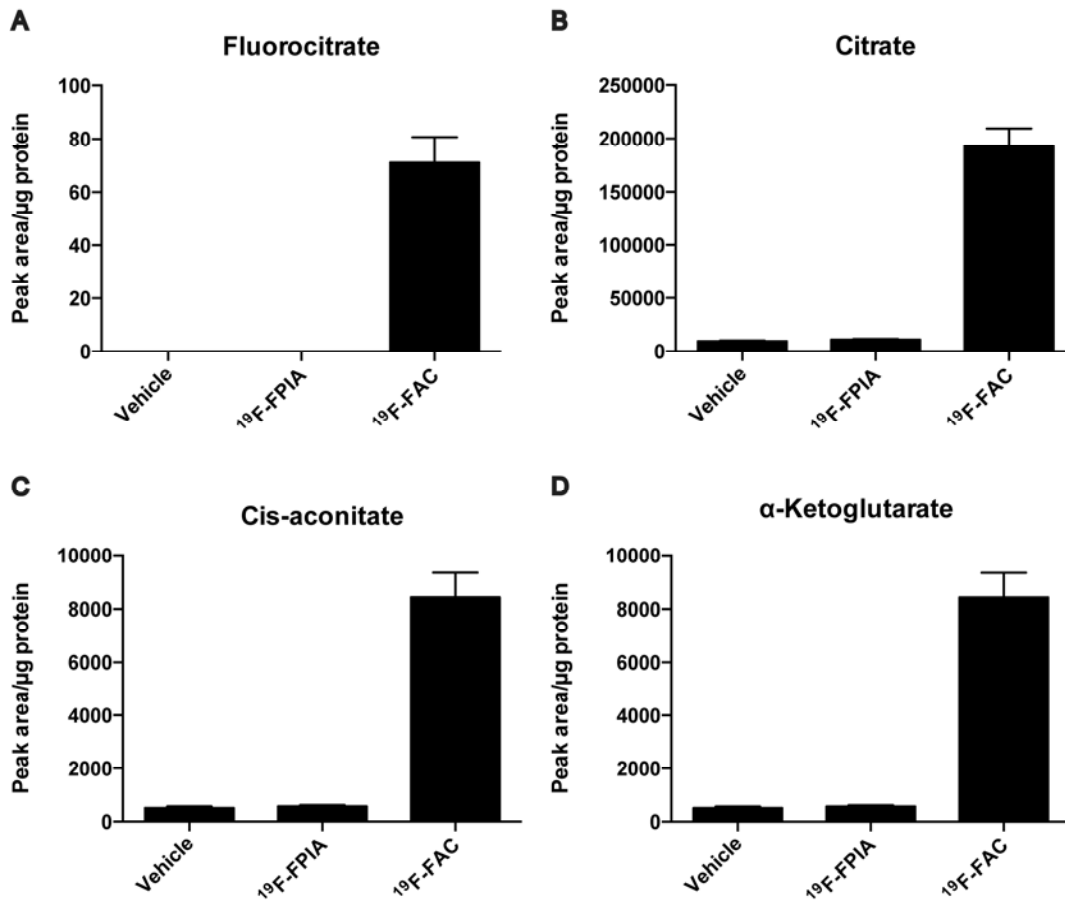

**SUPPLEMENTAL FIGURE 1.** Effect of exogenous  $^{19}\text{F}$ -FPIA and  $^{19}\text{F}$ -FAC on intracellular metabolite concentrations of fluorocitrate (A), citrate (B), cis-aconitate (C), and  $\alpha$ -ketoglutarate pools (D) as analyzed by liquid chromatography–mass spectrometry. Data are mean  $\pm$  SD ( $n = 4$ ).

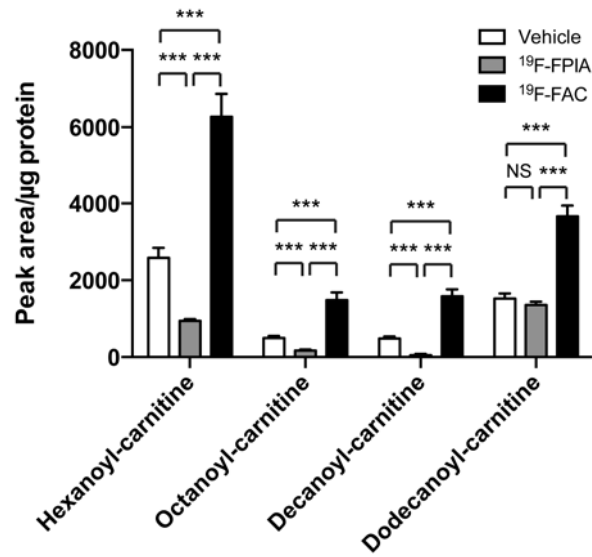

**SUPPLEMENTAL FIGURE 2.** Effect of exogenous <sup>19</sup>F-FPIA and <sup>19</sup>F-FAC on intracellular metabolite concentrations of medium-chain acyl-carnitine esters (6–10 carbon length). Data are mean ± SD (*n* = 4). \*\*\**P* < 0.001. NS = not significant.

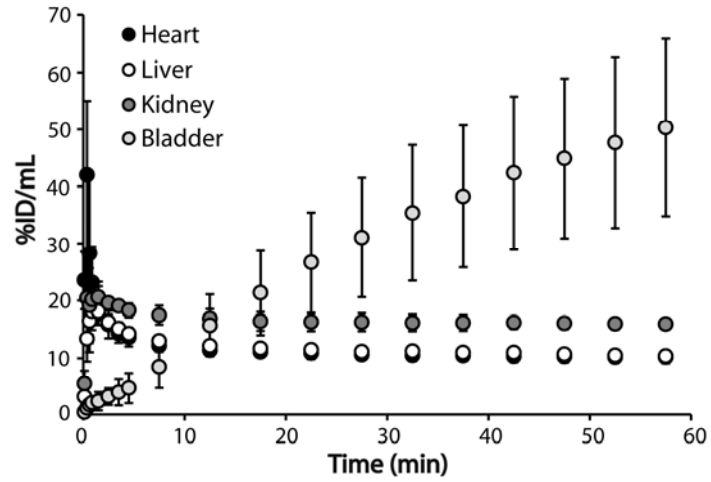

**SUPPLEMENTAL FIGURE 3.**  $^{18}\text{F}$ -FPIA tissue pharmacokinetics. TACs obtained from 60-min dynamic PET imaging. Data are mean  $\pm$  SD ( $n = 4$  mice per group).

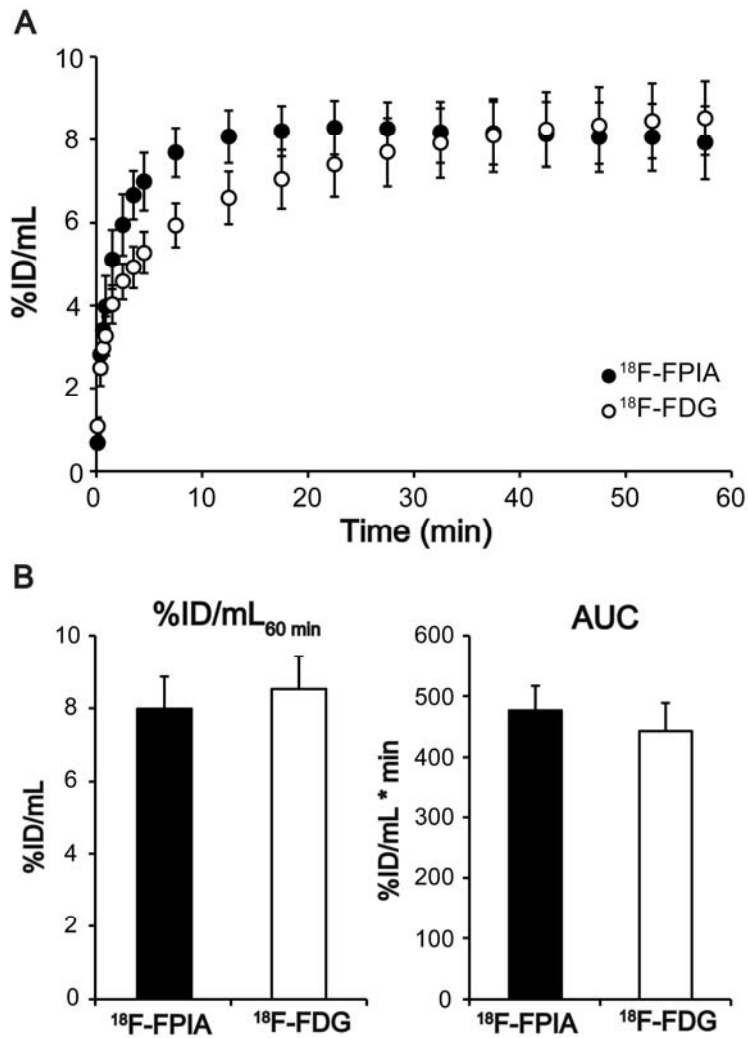

**SUPPLEMENTAL FIGURE 4.** Dynamic  $^{18}\text{F-FPIA}$  and  $^{18}\text{F-FDG}$  PET image analysis in EMT6 tumors. (A) EMT6 tumor TAC obtained from 60-min dynamic PET imaging. Data are mean  $\pm$  SD ( $n = 5$  mice per group). (B) Semiquantitative imaging variables extracted from the TAC. Data are mean  $\pm$  SD ( $n = 5$  mice per group).
